# Supplementary material for: Organic–inorganic shape memory thermoplastic polyurethane based on polycaprolactone and polydimethylsiloxane
Source: Royal Society of Chemistry journal article supplement (doi:10.1039/c6ra04041a), 2016-01-01
Supplement: c6ra04041a1.pdf [file c6ra04041a1.pdf]

## Supporting Information

### Organic-Inorganic Shape Memory Thermoplastic Polyurethane Based on Polycaprolactone and Polydimethylsiloxane

*Benjamin Qi Yu Chan, Sing Shy Liow, Xian Jun Loh\**

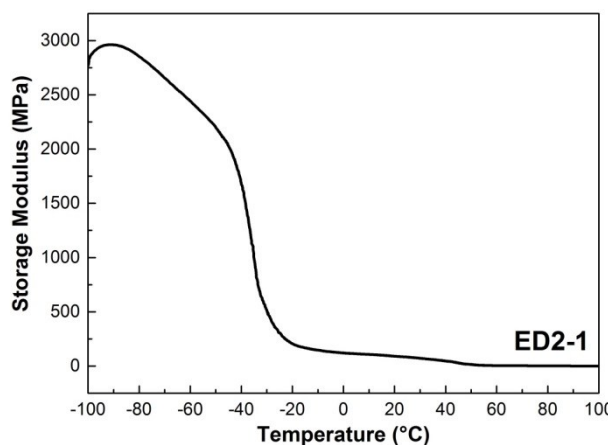

**Figure S1:** Thermomechanical analysis of poly(PCL/PDMS urethane), ED2-1, depicting change in storage modulus with temperature.

**Table S2**

Storage Modulus at 25 °C of poly(PCL/PDMS urethane)s

| Sample | Storage Modulus at 25 °C <sup>a</sup><br>(MPa) |
|--------|------------------------------------------------|
| ED1-1  | 62.5                                           |
| ED1-2  | 101.6                                          |
| ED2-1  | 82.9                                           |

<sup>a</sup> Storage modulus determined from DMA thermomechanical analysis results.

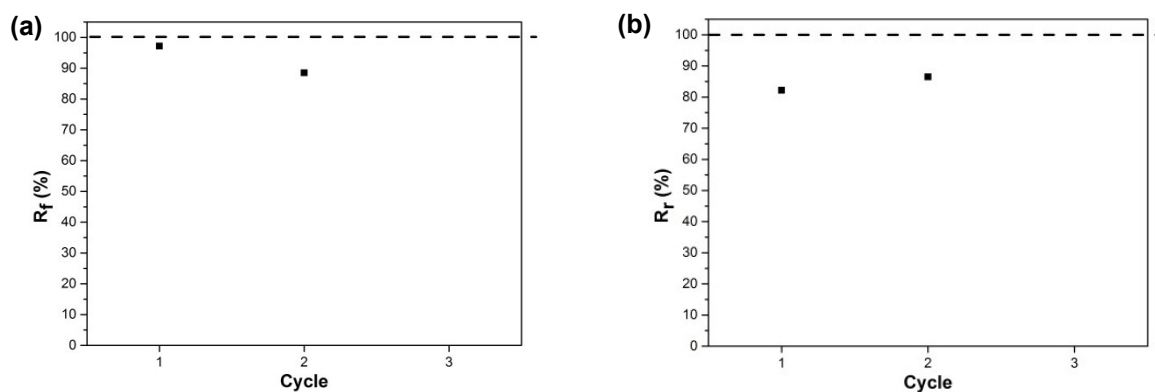

**Figure S3:** (a) Shape fixity ratio ( $R_f$ ) and (b) shape recovery ratio ( $R_r$ ) of poly(PCL/PDMS urethane), ED1-1.

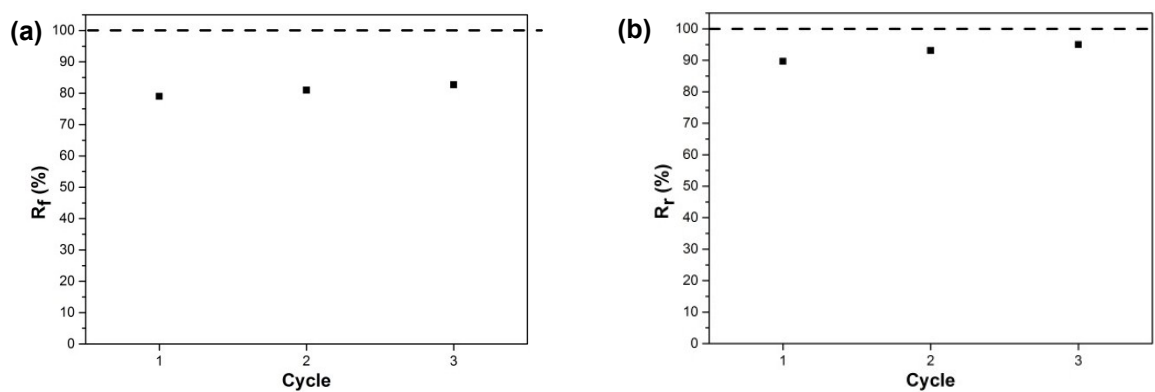

**Figure S4:** (a) Shape fixity ratio ( $R_f$ ) and (b) shape recovery ratio ( $R_r$ ) of poly(PCL/PDMS urethane), ED2-1.

**Fi**
